# Supplementary material
Source: publisher figshare collection journal article supplement (https://karger.figshare.com/articles/dataset/_/5120524)
Supplement: Supplementary file 1 [file 1]

## Movie 1

RAW264.7 macrophages were transfected with GFP-actin and labeled with lysotracker. Macrophages were allowed to phagocytose *C. albicans* yeast and unbound yeast was washed away. Cells were incubated at 37°C with 5% CO<sub>2</sub> for one hour. Images were collected and the movie represents 60 minutes of real-time microscopy. A) Transmission images. B) Lysotracker in red and actin in green. Large amounts of actin can be seen around the *C. albicans* (pseudo)-hyphae that is pushing out of the macrophage.

## Movie 2

RAW264.7 macrophages were transfected with GFP-actin and were challenged with *C. albicans* yeast. Unbound yeast was washed away and cells were incubated at 37°C with 5% CO<sub>2</sub>. After 2 hours image collection was started. The movie represents 125 minutes of real-time microscopy. A) Transmission images. B) GFP-actin shows the dynamic movement of actin around the *C. albicans* (pseudo)-hyphae.
