# Supplementary material
Source: publisher figshare collection journal article supplement (https://karger.figshare.com/articles/dataset/_/5120524)
Supplement: Supplementary file 2 [file 1]

Archive with 9 entries (9 files):
- JIN012_Movie1.AVI
- JIN012_Movie1A.AVI
- JIN012_Movie1B.AVI
- JIN012_Movie2.AVI
- JIN012_Movie2A.AVI
- JIN012_Movie2B.AVI
- JIN012_Movie3.AVI
- JIN012_Movie4.AVI
- Movies_Legends.pdf
